# Supplementary material for: Splicing conservation signals in plant long non-coding RNAs
Source: bioRxiv or medRxiv preprint supplement (doi:10.1101/588954), 2020-04-02
Supplement: Supplementary file [file media-1.pdf]

# Splicing conservation signals in plant long non-coding RNAs

Jose Antonio Corona-Gomez<sup>a</sup>, Irving Jair Garcia-Lopez<sup>a</sup>, Peter F. Stadler<sup>c,d,e,f,h,\*</sup>, Selene L. Fernandez-Valverde<sup>b,\*</sup>

<sup>a</sup>Unidad de Genómica Avanzada, Langebio, Cinvestav, Km 9.6 Libramiento Norte Carretera León, 36821 Irapuato, Guanajuato, México

<sup>b</sup>CONACYT, Unidad de Genómica Avanzada, Langebio, Cinvestav, Km 9.6 Libramiento Norte Carretera León, 36821 Irapuato, Guanajuato, México

<sup>c</sup>Bioinformatics Group, Department of Computer Science, University Leipzig, Härtelstraße 16-18, D-04107 Leipzig, Germany

<sup>d</sup>Interdisciplinary Center for Bioinformatics, University Leipzig, Härtelstraße 16-18, D-04107 Leipzig, Germany

<sup>e</sup>Max Planck Institute for Mathematics in the Sciences, Inselstraße 22, D-04103 Leipzig, Germany

<sup>f</sup>Department of Theoretical Chemistry, University of Vienna, Währingerstraße 17, A-1090 Wien, Austria

<sup>g</sup>Facultad de Ciencias, Universidad Nacional de Colombia, Sede Bogotá, Colombia

<sup>h</sup>Santa Fe Institute, 1399 Hyde Park Rd., Santa Fe, NM 87501, USA

## SUPPLEMENTAL MATERIAL

Table S1: **Genome versions used in this study.**

| Species                        | Ensembl ID             | Source         |
|--------------------------------|------------------------|----------------|
| <i>Aethionema arabicum</i>     | GCA_000411095.1        | NCBI           |
| <i>Arabidopsis halleri</i>     | GCA_900078215.1        | Phytosome v12  |
| <i>Arabidopsis lyrata</i>      | GCA_000004255.1        | Ensembl-Plants |
| <i>Arabidopsis thaliana</i>    | GCA_000001735.1 TAIR10 | Ensembl-Plants |
| <i>Arabis alpina</i>           | GCA_000733195.1        | NCBI           |
| <i>Boechera stricta</i>        | GCA_002079875.1        | NCBI           |
| <i>Brassica napus</i>          | GCA_000686985.1        | Ensembl-Plants |
| <i>Brassica rapa</i>           | GCA_000309985.1        | Ensembl-Plants |
| <i>Camelina sativa</i>         | GCA_000633955.1        | NCBI           |
| <i>Capsella rubella</i>        | GCA_000375325.1        | Phytosome v12  |
| <i>Leavenworthia alabamica</i> | GCA_000411055.1        | NCBI           |
| <i>Raphanus sativus</i>        | GCA_000801105.2        | NCBI           |
| <i>Schrenkiella parvula</i>    | GCA_000218505.1        | NCBI           |
| <i>Sisymbrium irio</i>         | GCA_000411075.1        | NCBI           |
| <i>Brassica oleracea</i>       | GCA_000695525.1        | Ensembl-Plants |
| <i>Eutrema salsugineum</i>     | GCA_000478725.1        | NCBI           |

\*Corresponding authors

Email addresses: jose.corona@cinvestav.mx (Jose Antonio Corona-Gomez), irving.garcia@cinvestav.mx (Irving Jair Garcia-Lopez), studla@bioinf.uni-leipzig.de (Peter F. Stadler), selene.fernandez@cinvestav.mx (Selene L. Fernandez-Valverde)

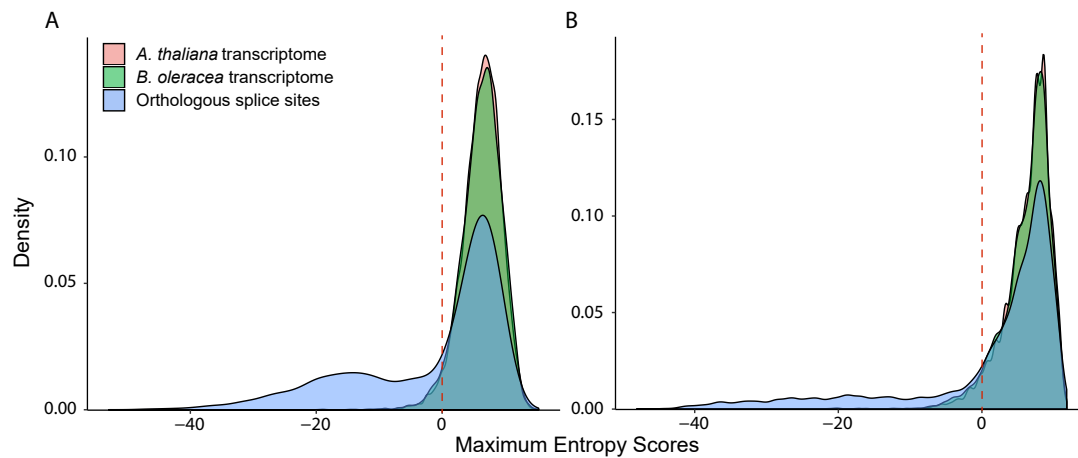

Figure S1: **Density distribution of MES** for splice sites in the donor (A) and acceptor (B) site as identified in *A. thaliana* (pink) and *B. oleracea* (green) transcriptomes compared to orthologous splice sites (blue) identified by position in the Cactus generated WGA. The red line denotes the Maximum Entropy threshold used to consider a splice site as real in the alignment (MES > 0).

**Dataset 1:**

TrackHubs of WGA, including annotation of splicing sites, Araport11 annotations and own lincRNA annotation.  
[www.bioinf.uni-leipzig.de/Publications/SUPPLEMENTS/19-001/BrassicaceaeWGA/hub.txt](http://www.bioinf.uni-leipzig.de/Publications/SUPPLEMENTS/19-001/BrassicaceaeWGA/hub.txt)

**Dataset 2:**

Table of the splice sites, the table contains all the splicing sites that we have predicted for *A. thaliana* and their homologs by position in the 15 species of the WGA. <http://www.bioinf.uni-leipzig.de/Publications/SUPPLEMENTS/19-001/SplicingMap.tsv>

**Dataset 3:**

Scripts used in creation of splicing map.  
[bitbucket.org/JoseAntonioCorona/splicing\\_map\\_plants](https://bitbucket.org/JoseAntonioCorona/splicing_map_plants).

**Dataset 4:**

Conservation table by position of TE and lincRNAs overlapping TE.  
<http://www.bioinf.uni-leipzig.de/Publications/SUPPLEMENTS/19-001/lincRNA-overlap-TE.tsv>

**Dataset 5:**

BED files of our lincRNAs for *A. thaliana* and their homologs by genomic position in the 15 species of the WGA  
<http://www.bioinf.uni-leipzig.de/Publications/SUPPLEMENTS/19-001/lincRNAs-position/>
